# Supplementary material for: Exploring support, experiences and needs of older women and health professionals to inform a self-management package for urinary incontinence: a qualitative study
Source: HighWire-hosted journal article supplement (doi:10.1136/bmjopen-2023-071831), 2023-07-01
Supplement: bmjopen-2023-071831supp002_data_supplement.pdf [file bmjopen-2023-071831supp002_data_supplement.pdf]

**SUPPLEMENTARY FILE 2****Interview Topic Guide for Health Professionals****Urinary incontinence self-management: intervention development**

The aim of this interview is to explore health professionals' (HP) views and experiences in helping and supporting patients cope with urinary incontinence. This will involve exploring:

- Common problems seen relating to urinary incontinence
- General care and specific skills that HPs use to teach patients to control urine loss and other problems
- Experiences of supporting patients self-cope with their problems
- HPs' expectations on managing urinary incontinence and desired support

**1. Introduction**

*Aim: To introduce the research and set the context for the proceeding discussion.*

- Introduce self and the University of Leeds
- Introduce the study: what it is about
- Explain how they were selected
- Talk through key points:
  - length of interview – up to 60 mins
  - interview like an informal discussion, although specific topics to cover
  - no right or wrong answers, their own views are very important
  - participation is voluntary and they have the right to withdraw at any time
  - recording of interview, with consent
- Confidentiality and anonymity, secure transfer of data, how findings will be reported
- Thank you for taking part
- Any questions they may have before start

## STARTING RECORDING

- Confirm I have gone through information with them and they are happy to proceed
  - 2. **Common problems seen relating to urinary incontinence**
- 

*Aim: to understand what common problems suffered by older women in clinics*

- Job title
  - any specific relevant training
- what is their current role
  - routine activities in clinics/setting
  - referral criteria
- Problems that are often seen
  - common symptoms of urine loss
  - population at risk of having urinary incontinence
  - experiences with older women
  - specific factors relating to older women
- Other common problems seen associated with urinary incontinence
  - physical e.g. disturbed sleeping
  - emotional e.g. mood, feeling low/not confident
  - disturbed relationships (partners/families/social)
  - effects on social activities

## 3. **General care and specific skills that HPs use to teach patients to control the problems**

---

*Aim: to understand general care provided and specific skills taught to patients controlling their problems*

- General care provided for older women (*probe fully*)
  - assessment
  - treatment process
    - ✓ total length
    - ✓ no. of appointments and length of each appointment
  - follow-up process
  - materials provided
- Ways to control urine loss (*probe fully*)
  - how to decide which skills to be taught to different symptoms

- ✓ stressed urinary incontinence
- ✓ urgent urinary incontinence
- ✓ mixed urinary incontinence
- whether it has been effective
- whether it is easy to teach
- follow-up process
- materials provided
- Ways to cope with other related problems (*probe fully*)
  - physical: e.g. exercise
  - emotional: e.g. meditation/faith
  - social life
  - whether it has been effective
  - whether it is easy to teach
  - follow-up process
  - materials provided

#### 4. Experiences of supporting patients self-cope their problems

---

*Aim: to understand experiences of coping with urine loss and other related problems*

- Facilitators and barriers (*probe fully*)
  - best things about teaching patients to self-cope these problems
  - worst things about teaching patients to self-cope these problems
  - what makes their care easier (*start openly then probe as necessary*)
  - what makes their care harder (*start openly then probe as necessary*)
- Monitoring of signs and symptoms (*probe fully*)
  - any changes in urine loss and other problems
    - ✓ if so, what the changes are and how long it takes to experience changes
    - ✓ if not, how they cope now
  - how to recognise the changes (any questionnaires, materials used)
    - ✓ urine loss
    - ✓ other problems
  - discharge criteria
  - what matters most when supporting patients to cope their problems

## 5. HPs' expectations on managing urinary incontinence and desired support

---

*Aim: to explore HPs' expectations, desired support and what they want to achieve*

- Expected outcomes by supporting patients (*probe fully*)
  - knowledge and information
  - signs and symptoms
  - physical/emotional/social
  - other things important for HPs to achieve
- Desired support
  - services
  - health professionals
  - other resources, support and training
- If there is a book for patients aiming to demonstrate how to self-cope urinary incontinence and related problems (*probe fully*) (*explain fully this would be evidence-based, how it will be developed*)
  - expected content
  - should it be 'stand alone' or facilitated by someone
    - ✓ if yes, who would be the ideal facilitator
- Any other issues they would like to raise

### **At the end of the interview:**

- Thank respondent for participation in the interview.
- Check whether they have any remaining questions about the research.
- Provide reassurances about confidentiality and anonymity.
- Ask if they would like to be informed of the outcomes of the research (check how they would prefer to be informed).
